# Supplementary material for: Unemployment and stillbirth risk among foreign-born and Spanish pregnant women in Spain, 2007–2010: a multilevel analysis study
Source: Springer Nature journal article supplement (doi:10.1007/s10654-013-9859-y), 2013-10-19
Supplement: MOESM3 [file 10654_2013_9859_MOESM3_ESM.doc]

**Supplementary Table 2.** Stillbirth risk by maternal sociodemographic characteristics, stratified by gestational age in weeks, Spain 2007-2010 (Total births: 1920235 and Stillbirths: 5 560; A: 11890 births and 3294 stillbirths; B: 1801335 births and 2266 stillbirths)

|  |  |  | A (≥22 to <37 gestational weeks) |  | B (≥37 gestational weeks) |
| --- | --- | --- | --- | --- | --- |
|  | **Variables** |  | aOR (95%CI) |  | aOR (95%CI) |
| **Year** |  |  |  |  |  |
|  | 2010 |  | 1.56 (1.37-1.79) |  | 1.34 (1.13-1.58) |
|  | 2009 |  | 1.51 (1.32-1.73) |  | 1.34 (1.14-1.58) |
|  | 2008 |  | 1.30 (1.13-1.49) |  | 1.35 (1.14-1.60) |
|  | 2007 |  | 1 |  | 1 |
| **Marital status** | |  |  |  |  |
|  | Married |  | 1.31 (0.99-1.74) |  | 1.32 (0.92-1.89) |
|  | Single |  | 1.92 (1.44-2.55) |  | 2.08 (1.45-2.99) |
|  | Other* |  | 1 |  | 1 |
| **Maternal age** | |  |  |  |  |
|  | ≥35 |  | 1.68 (1.31-2.17) |  | 3.08 (2.09-4.56) |
|  | 30-34 |  | 1.37 (1.06-1.75) |  | 2.25 (1.53-3.31) |
|  | 25-29 |  | 1.41 (1.10-1.81) |  | 1.78 (1.21-2.62) |
|  | 20-24 |  | 1.25 (0.96-1.62) |  | 1.36 (0.90-2.04) |
|  | ≤19 |  | 1 |  | 1 |
| **Maternal country of origin** | |  |  |  |  |
|  | European Union of 15 member states |  | 1.17 (0.83-1.67) |  | 0.49 (0.26-0.92) |
|  | Others European countries |  | 1.11 (0.94-1.31) |  | 1.01 (0.75-1.36) |
|  | Africa |  | 2.02 (1.73-2.36) |  | 2.03 (1.70-2.44) |
|  | America and the Caribbean |  | 0.82 (0.68-0.98) |  | 0.73 (0.57-1.36) |
|  | Asia and Oceania |  | 0.84 (0.53-1.33) |  | 0.63 (0.32-1.22) |
|  | Foreign-born, unknown country |  | 2.63 (1.53-4.51) |  | 0.54 (0.13-2.18) |
|  | Spain |  | 1 |  | 1 |
| **Maternal educational attainment** | |  |  |  |  |
|  | Secondary education or lower |  | 1.50 (1.26-1.74) |  | 2.42 (1.98-2.94) |
| Upper secondary education or first stage of tertiary education | | | 1.11 (0.94-1.31) |  | 1.37 (1.11-1.68) |
|  | Tertiary education |  | 1 |  | 1 |
| **Parity** |  |  |  |  |  |
|  | Nulliparous (first delivery) |  | 1.23 (1.10-1.35) |  | 1.56 (1.37-1.78) |
|  | Multiparous (≥2 deliveries) |  | 0.92 (0.78-1.07) |  | 1.25 (1.03-1.51) |
|  | Primiparous (1 delivery) |  | 1 |  | 1 |

Data source: INE In-house. aOR: Adjusted odds ratio *Other: Divorced or widowed
